# Supplementary material for: Control of Neural Daughter Cell Proliferation by Multi-level Notch/Su(H)/E(spl)-HLH Signaling
Source: PubMed Central journal article supplement (PMC4829154; doi:10.1371/journal.pgen.1005984), 2016-04-12
Supplement: pgen.1005984.s002.pdf [file pgen.1005984.s002.pdf]

# SUPPLEMENTAL DNA SEQUENCES

## Sequences of synthetic *m8* and *Su(H)* UAS constructs

DNA sequence is followed by protein sequence for each construct. For DNA; EcoRI and XbaI cloning sites underlined, start-ATG underlined-bold and mutated bases green. For protein; FLAG-tag blue-bold; HA-tag purple, bold; spacer red-bold; mutated “Ck2” amino acids green; mutated “deg” amino acids magenta; and Vp16 domain yellow.

### **m8-FLAG**

gaattcaacaaaa**ATG**GCCGACTACAAGGACGACGACGACAAGGGCCCCCCCCGGGCATGGAGTACA  
CCACCAAGACCCAGATCTACCAGAAGGTGAAGAAGCCCATGCTGGAGCGCCAGCGCCGCG  
CCCGCATGAACAAGTGCCTGGACAACCTGAAGACCCTGGTGGCCGAGCTGCGCGGGCGACGA  
CGGCATCCTGCGCATGGACAAGGCCGAGATGCTGGAGTCCGCCGTGATCTTCATGCGCCAG  
CAGAAGACCCCCAAGAAGGTGGCCCAGGAGGAGCAGTCCCTGCCCTGGACTCCTTCAAGA  
ACGGCTACATGAACGCCGTGAACGAGGTGTCCCGCGTGATGGCCTCCACCCCCGGCATGTC  
CGTGGACCTGGGCAAGTCCGTGATGACCCACCTGGGCCGCGTGTACAAGAACCTGCAGCAG  
TTCCACGAGGCCAGTCCGCCGCCGACTTCATCCAGAACTCCATGGACTGCTCCTCCATGGA  
CAAGGCCCCCCCTGTCCCCCGCCTCCTCCGGCTACCACTCCGACTGCGACTCCCCCGCCCCCT  
CCCCCAGCCCATGCAGCAGCCCCTGTGGCGCCCCCTGGtgataatagtctaga

**MADYKDDDDK****GPPG**MEYTTKTQIYQKVKKPLMLERQRRARMNKCLDNLKTLVAELRG  
DDGILRMDKAEMLESAVIFMRQQKTPKKVAQEEQSLPLDSFKNGYMNNAVNEVSRVMAS  
TPGMSVDLKGKSVMTHLGRVYKNLQFHEAQSAADFIQNSMDCSSMDKAPLSPASSGYH  
SDCDSPAPSPQPMQQPLWRPW

### **m8<sup>Ck2</sup>-FLAG**

gaattcaacaaaa**ATG**GCCGACTACAAGGACGACGACGACAAGGGCCCCCCCCGGGCATGGAG  
TACACCACCAAGACCCAGATCTACCAGAAGGTGAAGAAGCCCATGCTGGAGCGCCA  
GCGCCGCGCCCCGCATGAACAAGTGCCTGGACAACCTGAAGACCCTGGTGGCCGAGC  
TGCGCGGGCAGCAGGCATCCTGCGCATGGACAAGGCCGAGATGCTGGAGTCCGCC  
GTGATCTTCATGCGCCAGCAGAAGACCCCCAAGAAGGTGGCCCAGGAGGAGCAGTC  
CCTGCCCTGGACTCCTTCAAGAACGGCTACATGAACGCCGTGAACGAGGTGTCCCG  
CGTGTGGCCTCCACCCCCGGCATGTCCGTGGACCTGGGCAAGTCCGTGATGACCCA  
CCTGGGCCGCGTGTACAAGAACCTGCAGCAGTTCCACGAGGCCAGTCCGCCGCCGA

CTTCATCCAGAACTCCATGGACTGCTCCTCCATGGACAAGGCCCCCCTG<sup>g</sup>CCCCCGCC  
TCC<sup>g</sup>CCGGCTACCAC<sup>g</sup>CCGACTGCGACTCCCCCGCCCCCTCCCCCAGCCCATGCAGC  
AGCCCCTGTGGCGCCCTGGtataatagctaga

MADYKDDDDK<sup>g</sup>PPGMEYTTKTQIYQKVKKPKMLERQRRARMNKCLDNLKTLVAELRG  
DDGILRMDKAEMLESAVIFMRQKTPKKVAQEEQSLPLDSFKNGYMNNAVNEVSRVMAS  
TPGMSVDLGKSVMTHLGRVYKNLQFHEAQSAADFIQNSMDCSSMDKAPLA<sup>g</sup>PAS<sup>g</sup>AGY  
HA<sup>g</sup>DCDSPAPSPQMQLWRPW

### Su(H)-FLAG-HA

gaattcaacaaa<sup>A</sup>TGGCCGACTACAAGGACGACGACGACAAGGGCCCCCCCCGGGCATGAAGTCCT  
ACTCCAGTTCAACCTGAACGCCGCCGCCCCCCCCGCCATCGCCTACGAGACCACCGTGGT  
GAACCCCAACGGCTCCCCCTGGACCCCCACCAGCAGCAGCAGCAGCAGTCCCAGGACATG  
CCCCACTTCGGCCTGCCCGGCCCCAGCCCCCTCCTCCCAGCAGCAGCAGCAGCAGTGC  
AGGTGCACCACCAGCAGCAGCAGCAGCAGCAGCAGCAGCAGCAGCAGCAGCAGCAGCAGCACCAGC  
AGCAGATGCAGATGTCCCTGCTGCCCGGCCCTACCGCCCCACATCGAGGAGAAGAAGCT  
GACCCGCGACGCCATGGAGAAGTACATGCGCGAGCGCAACGACATGGTGTATCGTGTATCCTG  
CACGCCAAGGTGGCCAGAAGTCCTACGGCAACGAGAAGCGCTTCTTCTGCCCCCCCCCCT  
GCATCTACCTGTTCGGCTCCGGCTGGCGCCCGCTACGAGGAGATGCTGCAGCAGGGCGA  
GGGCGAGCAGGGCGCCAGCTGTGCGCCTTCATCGGCATCGGCTCCTCCGACCAGGACATG  
CAGCAGCTGGACCTGAACGGCAAGCAGTACTGCGCCGCCAAGACCCTGTTCATCTCCGACT  
CCGACAAGCGCAAGCACTTCATGCTGTCCGTGAAGATGTTCTACGGCAACGGCCACGACAT  
CGGCGTGTTCAACTCCAAGCGCATCAAGGTGATCTCCAAGCCCTCCAAGAAGAAGCAGTCC  
CTGAAGAACGCCGACCTGTGCATCGCCTCCGGCACCACGTGGCCCTGTTCAACCGCCTGC  
GCTCCCAGACCGTGTCCACCCGCTACCTGCACGTGGAGAACGGCCACTTCCACGCCTCCTCC  
ACCCAGTGGGGCGCCTTACCACCTACCTGCTGGACGACAACGAGTCCGAGTCCGAGGAGT  
TCCAGGTGCGCGACGGCTACATCCACTACGGCGCCACCGTGAAGCTGGTGTGCTCCGTGAC  
CGGCATGGCCCTGCCCCGCTGATCATCCGCAAGGTGGACAAGCAGATGGCCCTGCTGGAG  
GCCGACGACCCCGTGTCCAGCTGCACAAGTGCGCCTTCTACATGAAGGACACCGACCGCA  
TGTACCTGTGCCTGTCCAGGAGAAGATCATCCAGTTCAGGCCACCCCCTGCCCCAAGGA  
GCCAACAAGGAGATGATCAACGACGGCGCCTGCTGGACCATCATCTCCACCGACAAGGCC  
GAGTACCAGTTCTACGAGGGCATGGGCCCGTGGCCTCCCCCGTGACCCCGTGGCCATCGT  
GAACTCCCTGAACCTGAACGGCGGCGGACGTGGCCATGCTGGAGCTGTCCGGCGACAAC  
TTCACCCCCCCACCTGCAGGTGTGGTTCGGCGACGTGGAGGCCGAGACCATGTACCGCTGCA  
CCGAGACCCTGCTGTGCGTGGTGCCGAGATCTCCAGTTCGCGGGCAGTGGCTGTGGGT  
GCGCCAGCCCACCCAGGTGCCATCTCCCTGGTGCACGACGGCATCATCTACGCCACC  
GGCCTGACCTTACCTACCCCCGAGCCCGCCCCGCCCCACTGCAACACCCAGGCCG  
AGGACGTGATGCGCGCCCGCAGAACAACAACAACAACAACATCACCTCCATCTCCAACAA  
CAACAACCTCCAACAACGCCGGCTCCCCCGCCGCGGCGGGCCTGCAGCAGCAGCAGCAG

CAGCACCAGGCCCTGCCCTCCATCTCCGAGGTGCAGTGGA ACTCCCACGGCTCCGGCCTGTC  
CGGCCCCCCCCGGCTACCCCTACGACGTGCCCGACTACGCCtgataatagtctaga

**MADYKDDDDK****GPPG**MKSYSQFNLNAAAPPAIAYETT VVNPNGSPLDPHQQQQQS QD  
MPHFGLPGPQPPSSQQQQQLQVHHQQQQQQQQQQQQHQQQM QMSLLPGPYRPHI  
EEKLTRDAMEKYM RERNDMVIVILHAKVAQKSYGNEKRFFC P P P C I Y L F G S G W R R R Y  
EEMLQQGEGEQGAQLCAFIGIGSSDQDMQQLDLNGKQYCAAKTLFISDS DKRKHFMLS  
VKMFYGNHGDIGVFNSKRIKVISKPSKKKQSLKNADLCIASGTNVALFNRLRSQTVSTRY  
LHVENGHFHASSTQWGAFTIHLDDNESESEEFQVRDGYIHYGATVKLVCSVTGMALPR  
LIIRKVDKQMALLEADDPVSQLHKCAFYMKDTRMYLCLSQEKIIQFQATPCPKENKE  
MINDGACWTIISTDKAEYQFYEGMGPV ASPVTPVPIVNSLNLNGGGDVAMLELSGDNFT  
PHLQVWFGDVEAETMYRCTETLLCVVPEISQFRGEWLWVRQPTQVPISLVRNDGIYAT  
GLTFTYTPEPGPRPHCNTQAEDVMRARQNNNNNNNITSISNNNNSNNAGSPAAGGGLQQQ  
QQHQALPSISEVQWNSHGSGLS**GPPG****YPYDVPDYA**
