# Supplementary material for: Control of Neural Daughter Cell Proliferation by Multi-level Notch/Su(H)/E(spl)-HLH Signaling
Source: PubMed Central journal article supplement (PMC4829154; doi:10.1371/journal.pgen.1005984), 2016-04-12

# Supplemental Figure 1, related to Figure 1

## Notch Controls the Type I>0 Switch in NB5-6T

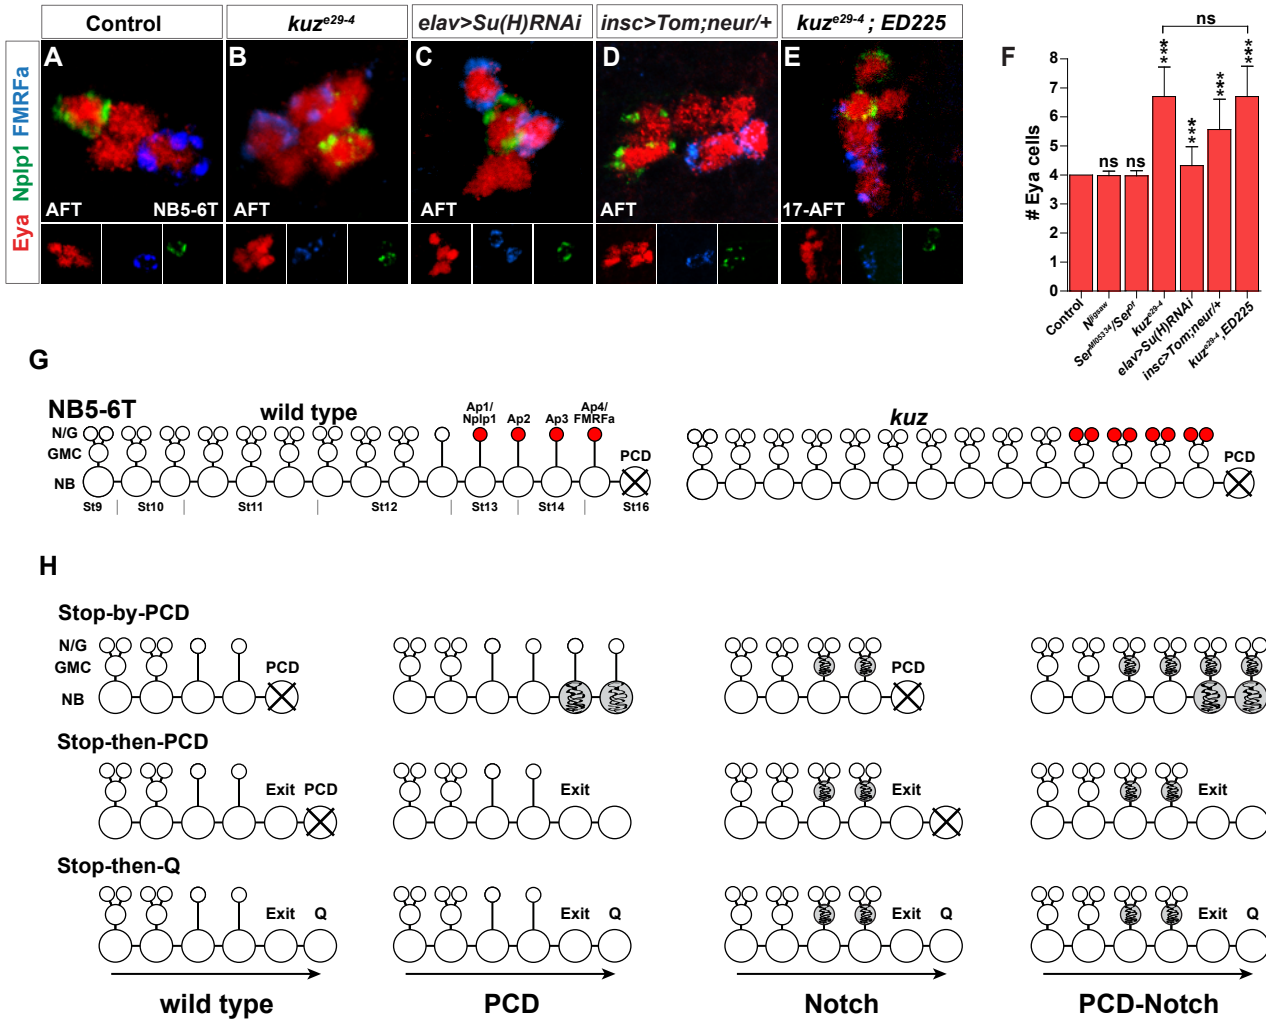

Supplement: pgen.1005984.s003.pdf [file pgen.1005984.s003.pdf]
