# Supplementary material for: Control of Neural Daughter Cell Proliferation by Multi-level Notch/Su(H)/E(spl)-HLH Signaling
Source: PubMed Central journal article supplement (PMC4829154; doi:10.1371/journal.pgen.1005984), 2016-04-12

**Supplemental Figure 3, related to Figure 3**  
**Eya numbers in *E(spl)-HLH* mutants,**  
***E(spl)m8-GFP* is expressed in NBs, including NB3-3A**

**A**

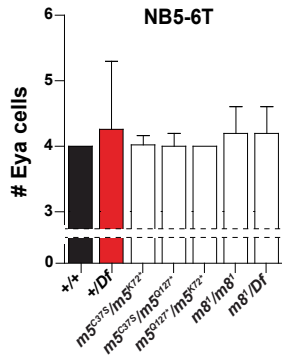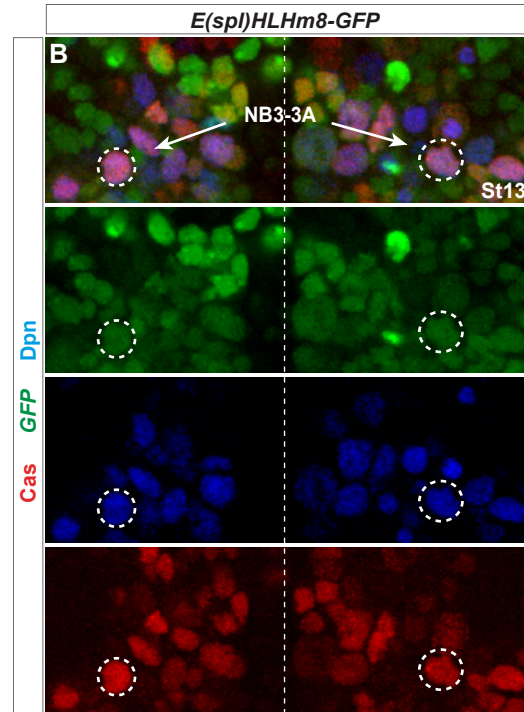

Supplement: pgen.1005984.s005.pdf [file pgen.1005984.s005.pdf]
