# Supplementary material for: Control of Neural Daughter Cell Proliferation by Multi-level Notch/Su(H)/E(spl)-HLH Signaling
Source: PubMed Central journal article supplement (PMC4829154; doi:10.1371/journal.pgen.1005984), 2016-04-12

**Supplemental Figure 4, related to Figure 4**  
**Proneurals are not expressed in late NBs,**  
**and not affected in *kuz***

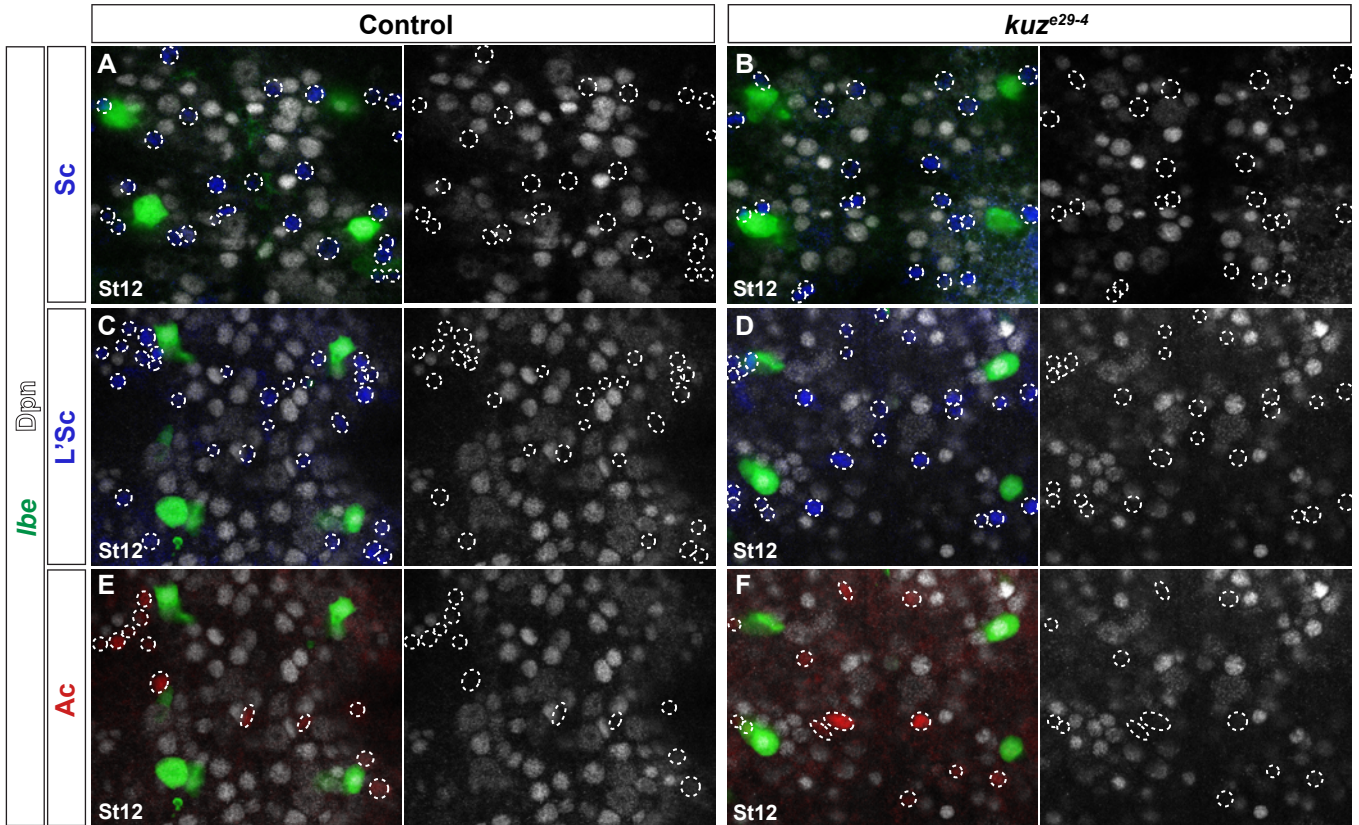

Supplement: pgen.1005984.s006.pdf [file pgen.1005984.s006.pdf]
