# Supplementary material for: Control of Neural Daughter Cell Proliferation by Multi-level Notch/Su(H)/E(spl)-HLH Signaling
Source: PubMed Central journal article supplement (PMC4829154; doi:10.1371/journal.pgen.1005984), 2016-04-12

# Supplemental Figure 6, related to Figure 5

## Generation of stabilized *UAS-m8*

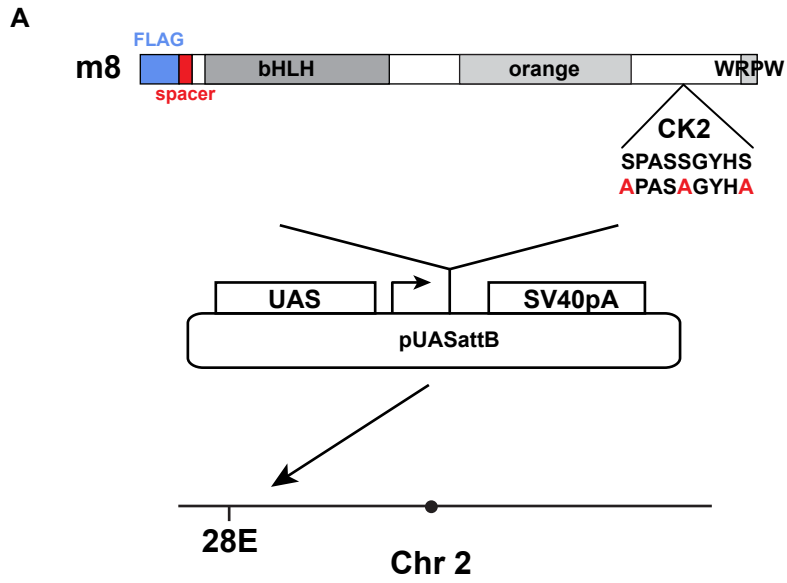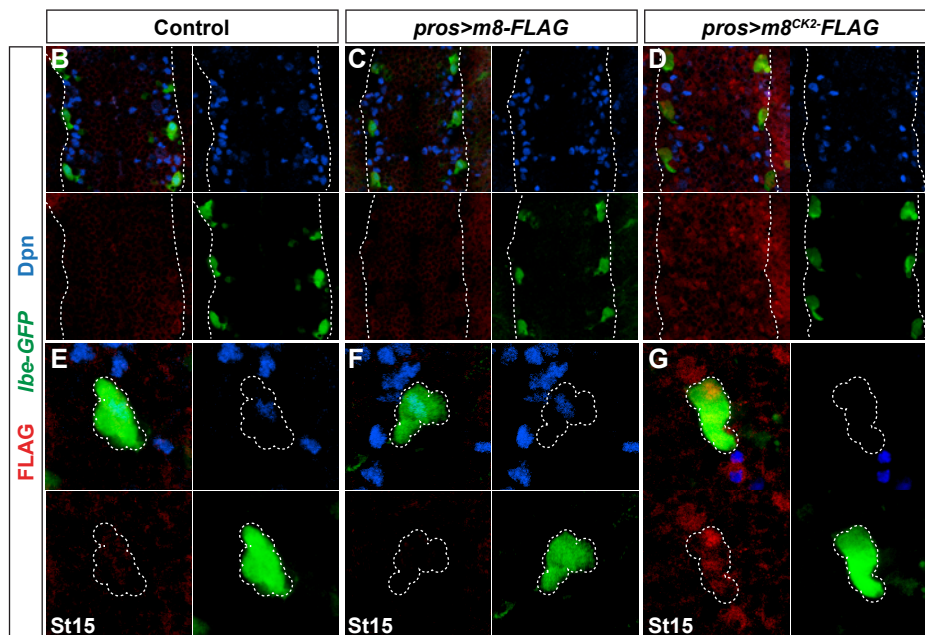

Supplement: pgen.1005984.s008.pdf [file pgen.1005984.s008.pdf]
