# Supplementary material for: Control of Neural Daughter Cell Proliferation by Multi-level Notch/Su(H)/E(spl)-HLH Signaling
Source: PubMed Central journal article supplement (PMC4829154; doi:10.1371/journal.pgen.1005984), 2016-04-12

**Supplemental Figure 7, related to Figure 5**  
**Stg expression levels in *pros>m8Ck2* and *kuz*;**  
**number of cells in NB5-6T lineage in *pros>m8Ck2***

**A**

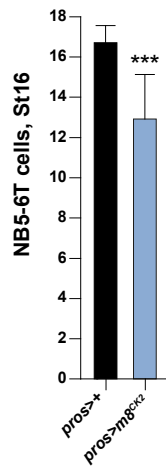

**B**

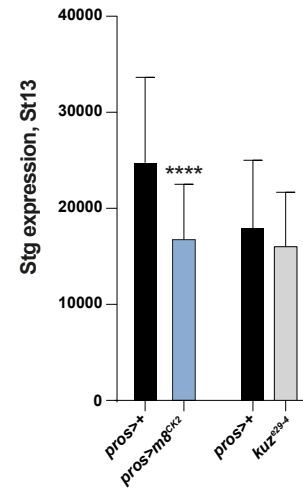

Supplement: pgen.1005984.s009.pdf [file pgen.1005984.s009.pdf]
