# Supplementary material for: Control of Neural Daughter Cell Proliferation by Multi-level Notch/Su(H)/E(spl)-HLH Signaling
Source: PubMed Central journal article supplement (PMC4829154; doi:10.1371/journal.pgen.1005984), 2016-04-12

# Supplemental Figure 8, related to Figure 6

## Su(H), m5 and m8 binding to *CycE* and *stg*

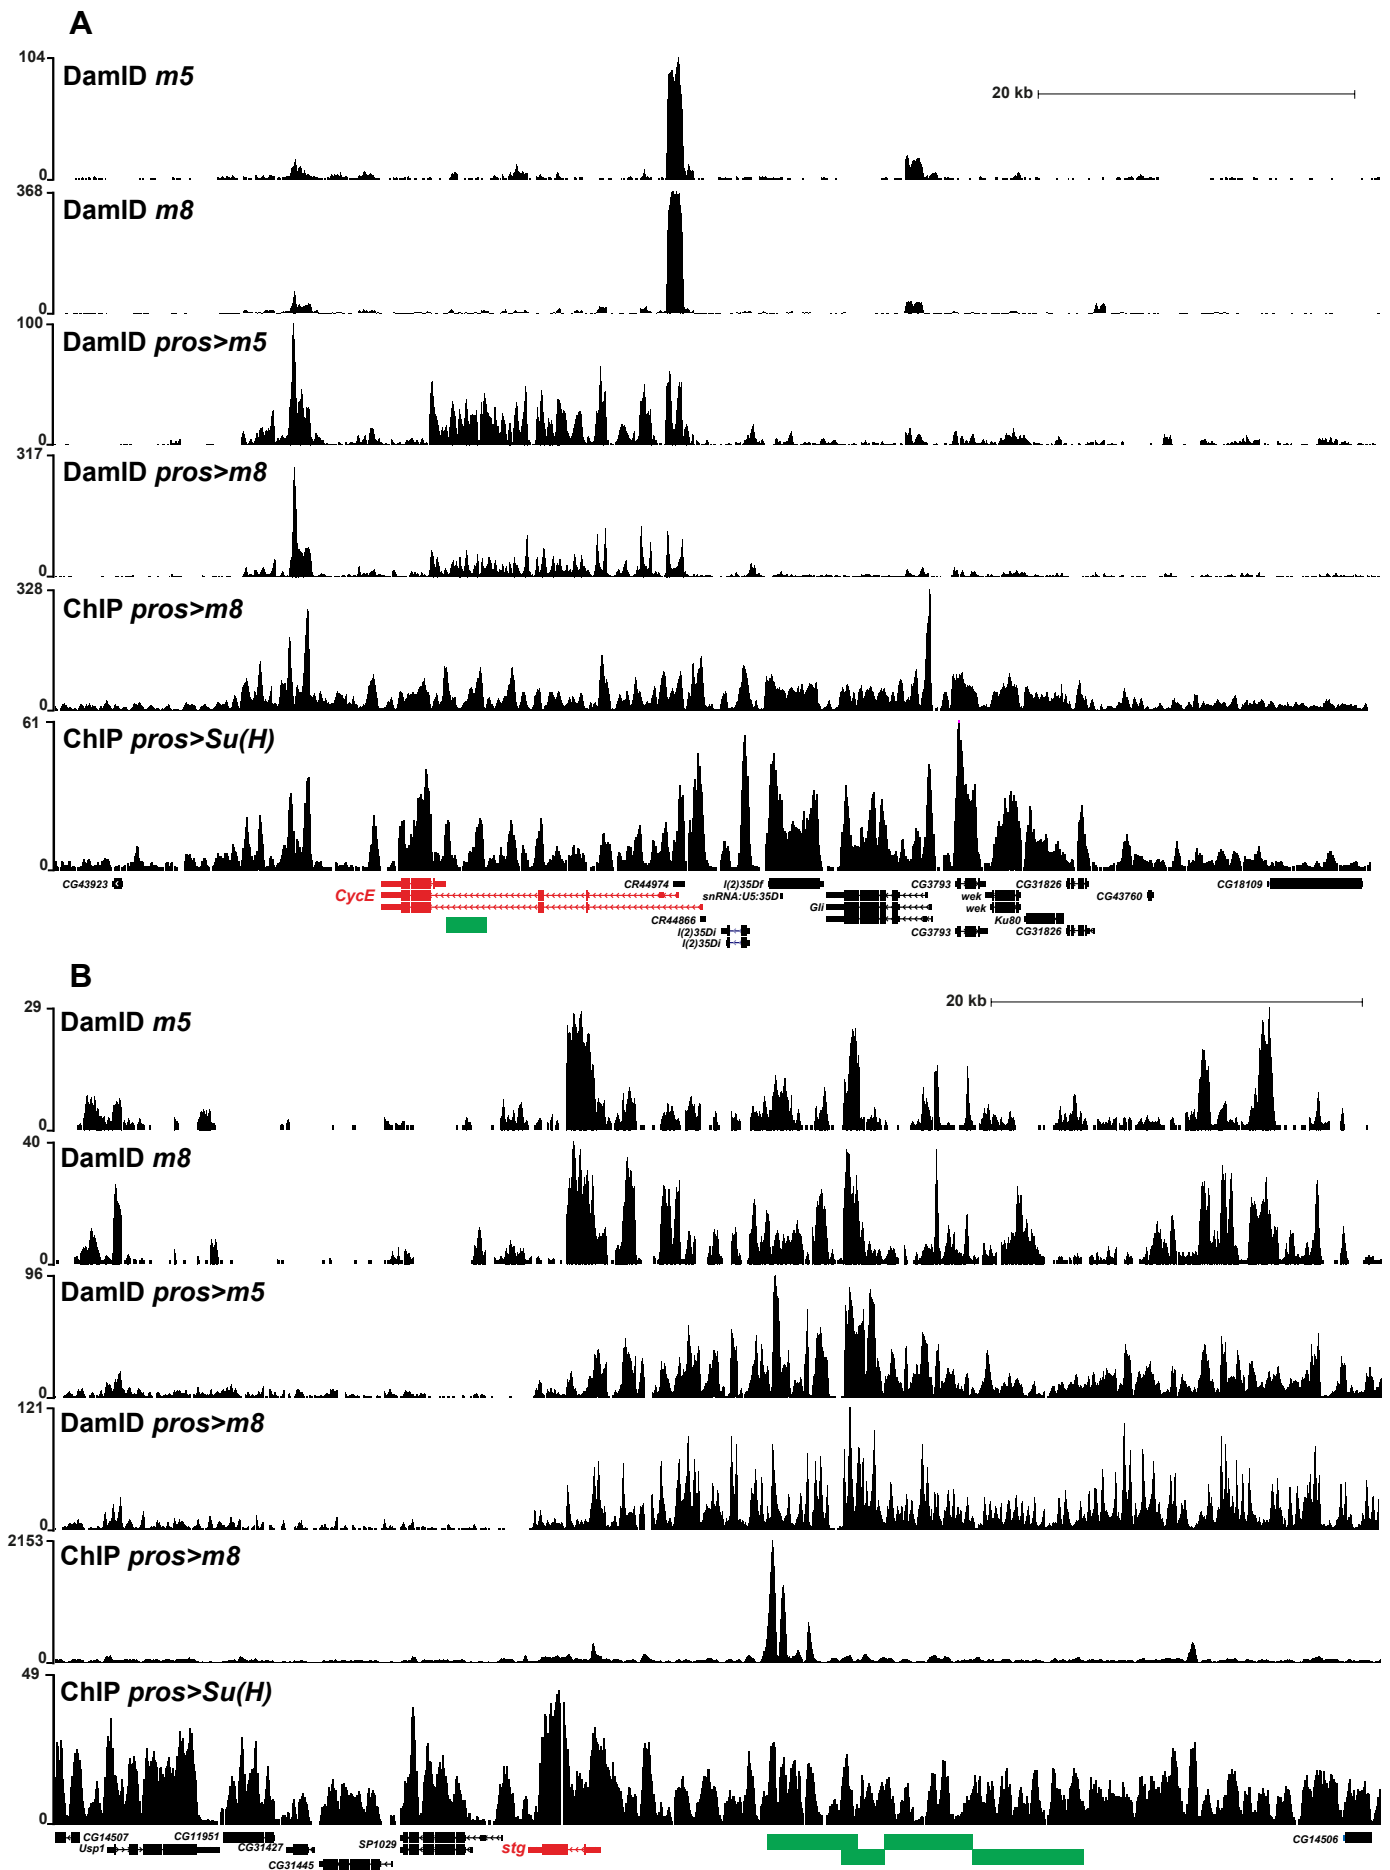

Supplement: pgen.1005984.s010.pdf [file pgen.1005984.s010.pdf]
