# Supplementary material for: Control of Neural Daughter Cell Proliferation by Multi-level Notch/Su(H)/E(spl)-HLH Signaling
Source: PubMed Central journal article supplement (PMC4829154; doi:10.1371/journal.pgen.1005984), 2016-04-12
Supplement: pgen.1005984.s011.pdf [file pgen.1005984.s011.pdf]

Supplemental Table 1, related to Figure 3. Identification of mutations in the *E(spl)* genes by Fly-TILL

| <u>Gene</u>                 | <u>PCR primer pairs</u>           | <u># mutations identified</u> | <u>Mutation</u> | <u>AA change</u> | <u>PCR frag. (bp)</u> | <u>Stowers Stock #</u> | <u>Bloomington Stock #</u> |
|-----------------------------|-----------------------------------|-------------------------------|-----------------|------------------|-----------------------|------------------------|----------------------------|
| <i>m8</i>                   | m8-539 ttagccgtgagcgaaaga         | 8                             | G343A           | V59M             | 911                   | SH_1251                | 61149                      |
|                             | m8-1450 tcccctccaacatccaataaag    |                               |                 |                  |                       |                        |                            |
| <i>m7</i>                   | m7-314 gctccgcaggtgggtggtt        | 12                            | G268A           | G86E             | 1011                  | SH_1228                | 61150                      |
|                             | m7-1325 agacttctgctcgattgattta    |                               | G249A           | E80K             |                       | SH_1098                | 61151                      |
|                             |                                   |                               | T322A           | V104E            |                       | SH_0477                | 61152                      |
| <i>m5</i>                   | m5-1334 cgatcatcaggcgggggaggtta   | 12                            | A278T           | K72*             | 1364                  | SH_0665                | 61153                      |
|                             | m5-2698 gctgcggctgctgcgggtat      |                               | C443T           | Q127*            |                       | SH_0507                | 61154                      |
|                             |                                   |                               | T173A           | C37S             |                       | SH_0357                | 61155                      |
|                             |                                   |                               | C582T           | T173I            |                       | SH_0738                | 61156                      |
| <i>m3</i>                   | m3-2294 gcaacgcacgcgaacaaactc     | 5                             | G144A           | E4K              | 1383                  | SH_0625                | 61157                      |
|                             | m3-3677 tggcggactgggacaagaatgaac  |                               |                 |                  |                       |                        |                            |
| <i>m<math>\gamma</math></i> | gamma-4949 tgcgggcaggtgagcgagtc   | 7                             | G280A           | G50D             | 1344                  | SH_0119                | 61158                      |
|                             | gamma-6293 ttgcgttctagcgttccgttct |                               | T437A           | N102K            |                       | SH_1107                | 61159                      |
| <i>m<math>\delta</math></i> | delta-4356 acggagtggggagagttca    | 8                             | G637T           | E161*            | 1406                  | SH_0313                | 61160                      |
|                             | delta-2950 gcgtggtggcagttagg      |                               | T323A           | L56Q             |                       | SH_0657                | 61161                      |
| <i>m<math>\beta</math></i>  | beta-2636 cgccggcgcaaaacttcc      | 14                            | G445A           | E47K             | 1377                  | SH_0839                | 61162                      |
|                             | beta-4013 tgtcccgtcgcactcactgtc   |                               | T621A           | H105Q            |                       | SH_0732                | 61163                      |

Total number of mutations identified: 66
